# Supplementary material
Source: PubMed Central journal article supplement (PMC1534118)
Supplement: NIHMS11406-supplement-PDF_S1.pdf [file NIHMS11406-supplement-PDF_S1.pdf]

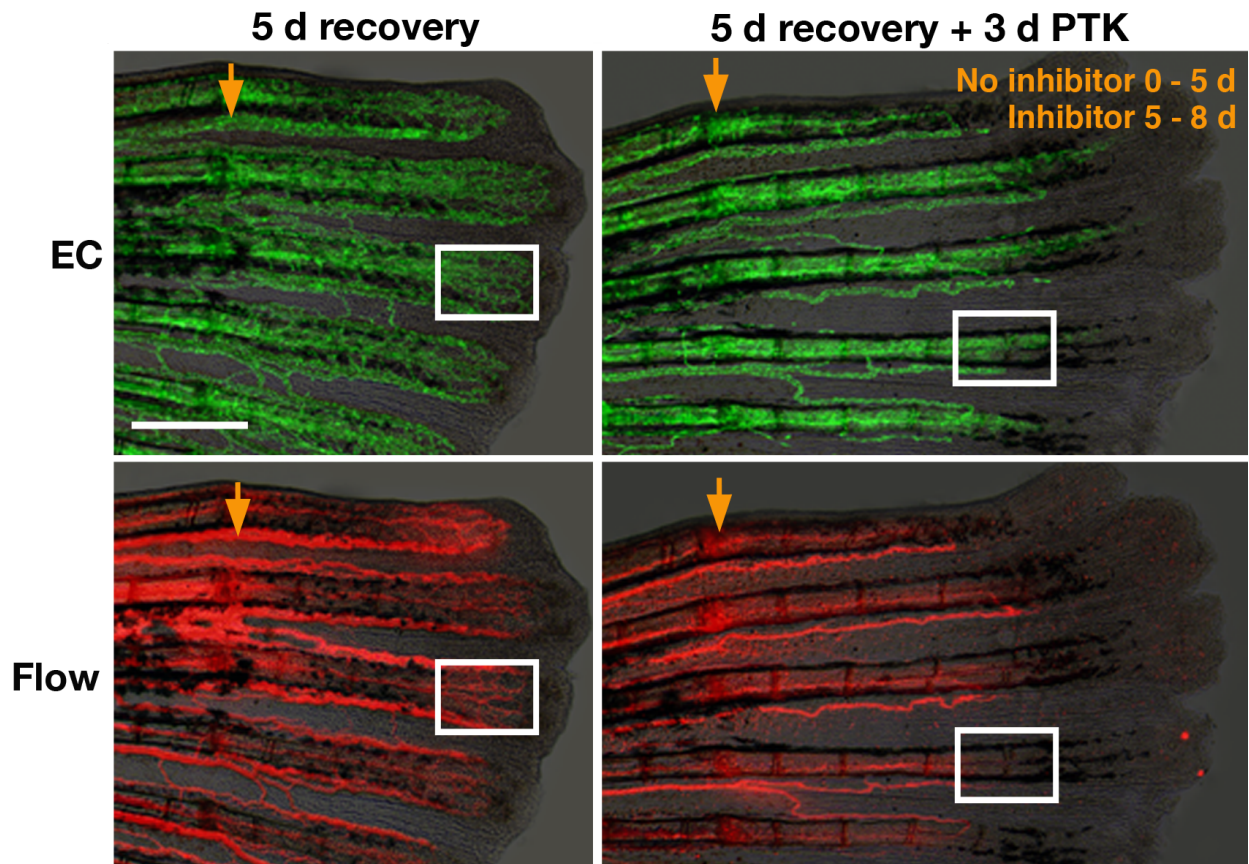

**Supplementary Figure 1.** Nascent vessels are more susceptible to VEGFR inhibition. (a, b). Zebrafish caudal fins were clipped and allowed to recover for 5 days (5d) in fish water. (c, d). After 5 days of recovery, the zebrafish were treated with 500 nM PTK787 for the next 3 days. The same fish was visualized on day 5 and day 8 using endothelial-eGFP and angiography as indicated. White boxes indicate loss of distal endothelial cells upon PTK787 administration. Scale bar is 500  $\mu\text{m}$  (a-d).
