# Supplementary material
Source: PubMed Central journal article supplement (PMC1534118)
Supplement: NIHMS11406-supplement-PDF_S4.pdf [file NIHMS11406-supplement-PDF_S4.pdf]

**Supplemental Table 2.** Targeted genes and primers used for real time PCR analysis.

| <b>Gene name</b>     | <b>Genbank accession number</b> | <b>Forward primer</b>             | <b>Reverse primer</b>         |
|----------------------|---------------------------------|-----------------------------------|-------------------------------|
| <b>Beta-actin</b>    | AF057040                        | CGAGCAGGAGA<br>TGGGAACC           | CAACGGAAACGCTCAT<br>TGC       |
| <b>VEGFA</b>         | AF016244                        | CAGCTGTCAAG<br>AGTGCCTACAT<br>AC  | CATCAGGGTACTCCTGC<br>TGAATTTC |
| <b>VEGFR2</b>        | NM_131472                       | TCACATGGTTT<br>GGTAGAGGGAT<br>CTC | GTGCAGTTGATCCTCTG<br>CAAATGAG |
| <b>VEGFR1</b>        | AY848694                        | GGAACGGAGAT<br>GCACGCTTA          | TCTCCAGAGCAGGAC<br>TCCA       |
| <b>Semaphorin3aa</b> | NM_131060                       | CATGGGACGAG<br>ACTTTGCCA          | CGCTCTCCGGGATCAG<br>ATGT      |
| <b>EphrinB2a</b>     | AF375225                        | AGCCAGATGCA<br>TCTCCTCATG         | GAGGCGATGCAGGCAA<br>ACAG      |
